# Supplementary material
Source: Research Square preprint supplement (doi:10.21203/rs.3.rs-9441808/v1)
Supplement: Supplementary file 1 [file 5e0db3be2ef076044356bfb1.doc]

**Synthesis, Structure, DFT Modeling, and Molecular Docking of a Novel Pentacoordinate Iron(II) Porphyrinate Complex**

**Mondher Dhifet [a, b]*, Bouzid Gassoumi [c]*, Habib Nasri [a]**

[a] *Laboratory of Physical Chemistry of Materials (LR01ES19), Faculty of Sciences of Monastir, Avenue of the Environment, 5019 Monastir, Tunisia.*

[b] *Faculty of Sciences of Gafsa, University of Gafsa, Sidi Ahmed Zarrouk, 2112 Gafsa, Tunisia.*

[c] *Laboratory of Advanced Materials and Interfaces (LIMA), University of Monastir, Faculty of Science of Monastir, Avenue of Environment, 5019 Monastir, Tunisia.*

***Corresponding authors:** [dhifetmondher@gmail.com](mailto:dhifetmondher@gmail.com) (Mondher Dhifet), [gassoumibouzid362@gmail.com](mailto:gassoumibouzid362@gmail.com) (Bouzid Gassoumi).

**Contents**

1. Synthesis of starting products...…………………………………………….……………….2

2. UV/Vis spectroscopy………………………………………………….…………………….4

3. IR spectroscopy……………….……………………………………….…………………….5

4. X-ray molecular structure of complex **I**….…………………………….……….........….......6

**1. Synthesis of starting products**

**
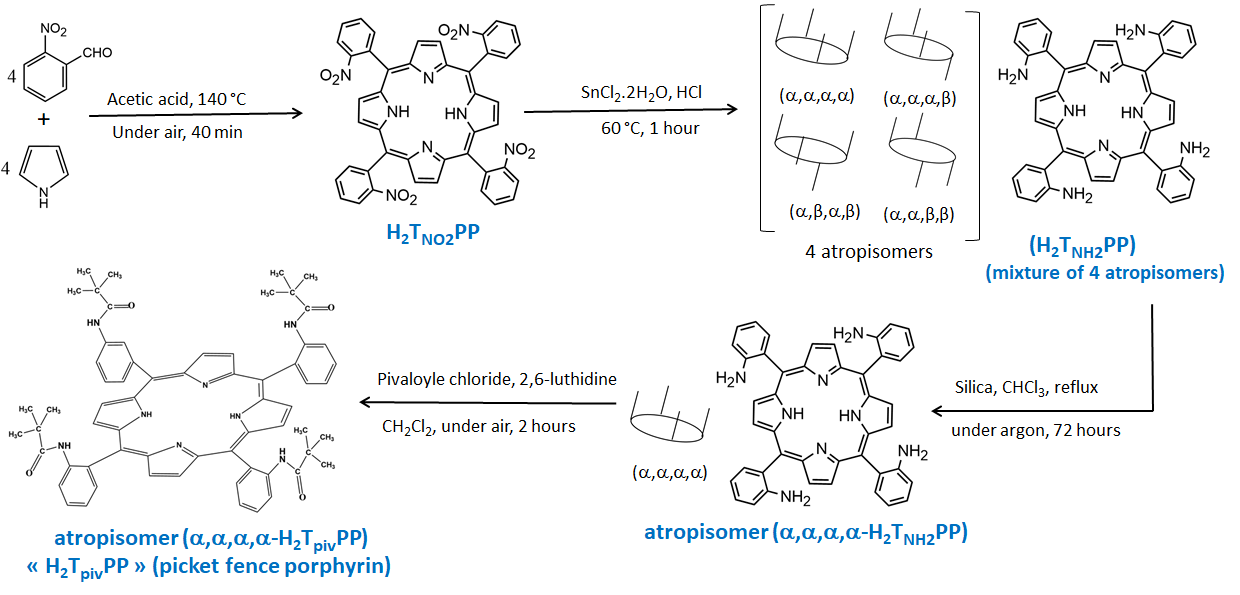
**

**Scheme S1**. Scheme of the preparation of the picket fence porphyrin (H2TpivPP).


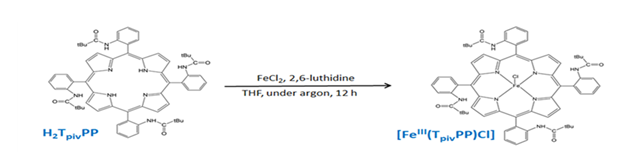


**Scheme S2**.Scheme of the preparation of the complex [FeIII(TpivPP)Cl].


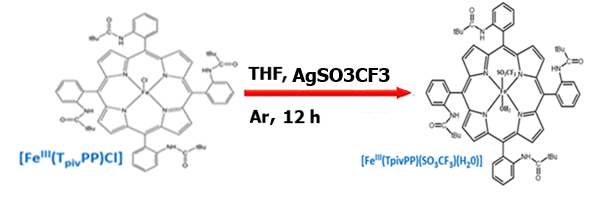


**Scheme S3**.Scheme of the preparation of the complex [FeIII(TpivPP)(SO3CF3)(H2O)].

**2. UV/Vis spectroscopy**


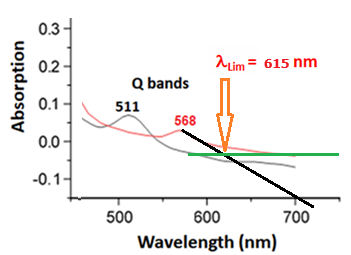


**Figure S1**. Determination of the Lim of complex **I**.

**
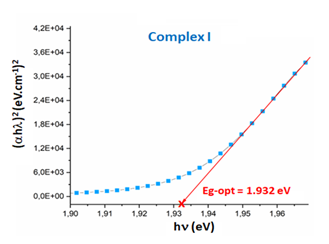
**

**Figure S2**. Plots of (αhυ)2 versus the photon energy (h) of complex I.

**3. IR spectroscopy**


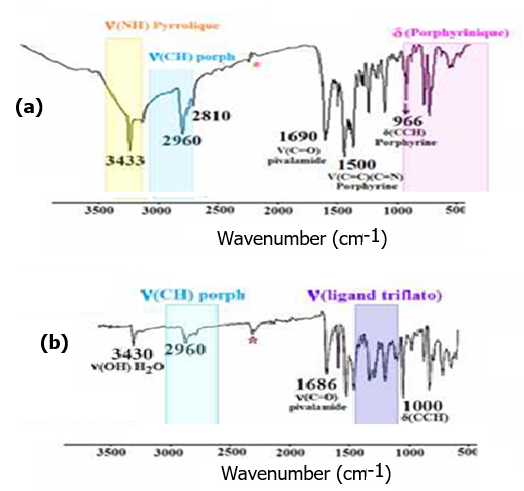


**Figure S3.** IR spectra of the free porphyrin H2TpivPP **(a)** and the [FeIII(TpivPP)(SO3CF3)(H2O)] **(b)**.

**4. X-ray molecular structure of complex I**


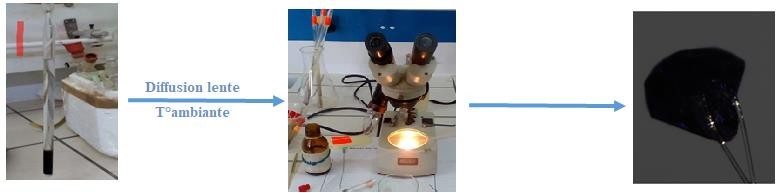


**Figure S4**. Steps in preparing a crystal for X-ray diffraction.

**Table S1**. Selected intermolecular interactions for complex **I**.

__________________________________________________________________________

D –H.…A**a** Symmetry of A D.…A (Å) D–H…A (°)

__________________________________________________________________________

C70-H70B…O3 1-x,1-y,1-z 3.452(1) 149

__________________________________________________________________________

**a**: D = donor atom and A = acceptor atom.
